# Supplementary material for: Case report: anti-IgLON5 disease combined with paraneoplastic cerebellar degeneration with the detection of anti-sulfatide IgG antibody, masquerading as meningoencephalitis
Source: PubMed Central journal article supplement — BMC Neurol. 2024 Dec 6;24:476. doi: 10.1186/s12883-024-03984-7 (PMC11622487; doi:10.1186/s12883-024-03984-7), 2024-12-06
Supplement: 12883_2024_3984_MOESM2_ESM.pdf [file 12883_2024_3984_MOESM2_ESM.pdf]

## 病例知情同意书

患者姓名：白兰风

监护人：吴北桃

文章标题：Case report: anti-IgLone5 disease with the detection of anti-IgYo and anti-IgSulfatide IgG antibodies, masquerading as cephalomeningitis.

本人白兰风，同意将影像学信息（省略或遮盖识别身份的信息）和/或病历资料以在线的形式在 BMC Neurology 杂志上进行发表和公布。本人已阅读文稿或了解文稿所包含内容的一般性描述，并审阅了所有涉及本人的将被发表的照片、插图，已知自己的姓名不会被公布，文章在杂志上发表后仅用于学术交流等合法用途。

患者/监护人签名：

吴北桃

作者签名：

左思典

日期：

2024年5月1日

## Case informed consent

Patient name: Lan-Feng Bai

Guardian: Bei-Tao Wu

Article title: Case report: anti-IgLone5 disease with the detection of anti-IgYo and anti-IgSulfatide IgG antibodies, masquerading as cephalomeningitis.

I am Bei-Tao Wu, the undersigned, agree to publish imaging information (omits or covers identifying information) and/or medical records online in the Frontiers in Neurology. I have read the manuscript or understood a general description of what it contains and have reviewed all photographs, illustrations that refer to me for publication, knowing that my name will not be published, that the article after being published will only be used for legitimate purposes such as academic exchange, etc.

Patient/ Guardian signature:

Bei-Tao Wu

Author signature:

Si-Dian Zhuang

Date:

May 1st, 2024
